# Supplementary material for: Aortic root aortopathy in bicuspid aortic valve associated with high genetic risk
Source: Springer Nature journal article supplement (doi:10.1186/s12872-021-02215-y), 2021-08-30
Supplement: MOESM1 [file 19611876]

Supplemental table 1. rare variants identified in BAV patients

| Gene    | Position       | Type | Function | dbSNP ID     | Protein      | Coding          |
|---------|----------------|------|----------|--------------|--------------|-----------------|
| EGFR    | chr7:55273254  | SNV  | missense | N.A.         | p.Glu1193Lys | c.3577G>A       |
| ELN     | chr7:73470642  | SNV  | missense | rs2229427    | p.Gly398Arg  | c.1192G>A       |
| ELN     | chr7:73467631  | SNV  | missense | rs571843793  | p.Ala363Val  | c.1088C>T       |
| FBN1    | chr15:48704767 | SNV  | missense | novel        | p.Glu2742Gly | c.8225A>G       |
| FBN1    | chr15:48712949 | SNV  | missense | novel        | p.Ile2585Thr | c.7754T>C       |
| FBN1†   | chr15:48720648 | SNV  | missense | novel        | p.Lys2298Glu | c.6892A>G       |
| FBN1    | chr15:48741042 | SNV  | missense | novel*       | p.Cys1865Tyr | c.5594G>A       |
| FBN1‡   | chr15:48725143 | SNV  | missense | novel        | p.Arg2220Gln | c.6659G>A       |
| FLNA    | chrX:153587625 | INS  | ins      | novel*       | p.His1431fs  | c.4291_4292insC |
| FLNA    | chrX:153594950 | SNV  | missense | rs370490152  | p.Glu349Lys  | c.1045G>A       |
| GATA5   | chr20:61041544 | SNV  | missense | novel        | p.Arg255Trp  | c.763C>T        |
| GATA5‡  | chr20:61050250 | SNV  | missense | novel        | p.Gly110Cys  | c.328G>T        |
| GATA6   | chr18:19751656 | SNV  | missense | rs387906816  | p.Ser184Asn  | c.551G>A        |
| GATA6   | chr18:19752095 | SNV  | missense | novel        | p.His330Gln  | c.990C>A        |
| GATA6   | chr18:19751308 | SNV  | missense | rs200483324  | p.Glu68Val   | c.203A>T        |
| NOTCH1  | chr9:139396455 | SNV  | missense | novel        | p.Arg1824Trp | c.5470C>T       |
| NOTCH1  | chr9:139401379 | SNV  | missense | novel        | p.Asp1230Glu | c.3690C>A       |
| NOTCH1  | chr9:139412303 | SNV  | nonsense | novel*       | p.Arg448Ter  | c.1342C>T       |
| NOTCH1  | chr9:139409131 | SNV  | missense | N.A.         | p.Asp680Asn  | c.2038G>A       |
| NOTCH1  | chr9:139399315 | SNV  | missense | rs369467132  | p.Ala1610Ser | c.4828G>T       |
| NOTCH1  | chr9:139401375 | SNV  | missense | N.A.         | p.Val1232Met | c.3694G>A       |
| NOTCH1  | chr9:139401321 | SNV  | missense | novel        | p.Gly1250Ser | c.3748G>A       |
| NOTCH1  | chr9:139402516 | SNV  | missense | rs374230681  | p.Gln1134Arg | c.3401A>G       |
| NOTCH1  | chr9:139411768 | SNV  | missense | rs201768800  | p.Arg504His  | c.1511G>A       |
| TGFBR2† | chr3:30691797  | SNV  | missense | novel        | p.Val125Ala  | c.374T>C        |
| TGFBR2  | chr3:30729962  | SNV  | missense | rs104893819* | p.Arg520Ter  | c.1558C>T       |
| TGFBR1  | chr9:101911535 | SNV  | nonsense | rs113605875* | p.Arg487Gln  | c.1460G>A       |

\*indicates pathogenic variant; ‡ and † indicate the variants in the same carrier corresponding to the symbol, respectively. dbSNP, the Single Nucleotide Polymorphism database; fs: frameshift; INS/ins, insertion; SNV: single nucleotide variant
